# Supplementary material for: Modeling of polycyclic aromatic hydrocarbons (PAHs) from global to regional scales: model development (IAP-AACM_PAH v1.0) and investigation of health risks in 2013 and 2018 in China
Source: Copernicus journal article supplement (doi:10.5194/gmd-17-8885-2024), 2024-12-18
Supplement: Supplementary file 1 [file gmd-17-8885-2024-supplement.pdf]

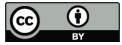

*Supplement of*

**Modeling of polycyclic aromatic hydrocarbons (PAHs) from global to regional scales: model development (IAP-AACM\_PAH v1.0) and investigation of health risks in 2013 and 2018 in China**

**Zichen Wu et al.**

*Correspondence to:* Xueshun Chen ([chenxsh@mail.iap.ac.cn](mailto:chenxsh@mail.iap.ac.cn)) and Zifa Wang ([zifawang@mail.iap.ac.cn](mailto:zifawang@mail.iap.ac.cn))

The copyright of individual parts of the supplement might differ from the article licence.

1 **Table S1. The standard values and chemical properties of soil.**

| Parameter                    | Symbol        | Units                          | Standard value                     |
|------------------------------|---------------|--------------------------------|------------------------------------|
| Bulk density                 | $\rho_s$      | kg m <sup>-3</sup>             | <sup>a</sup> 1350                  |
| Soil depth                   | $z_s$         | m                              | <sup>a</sup> 0.15                  |
| Organic carbon fraction      | $f_{oc}$      | kg kg <sup>-1</sup>            | <sup>a</sup> 0.0125                |
| Air diffusion coefficient    | $D_G^{air}$   | m <sup>2</sup> s <sup>-1</sup> | <sup>a</sup> 5.0×10 <sup>-6</sup>  |
| Liquid diffusion coefficient | $D_L^{water}$ | m <sup>2</sup> s <sup>-1</sup> | <sup>a</sup> 5.0×10 <sup>-10</sup> |
| Air content                  | $a$           | m <sup>3</sup> m <sup>-3</sup> | <sup>a</sup> 0.2                   |
| Water content                | $l$           | m <sup>3</sup> m <sup>-3</sup> | <sup>a</sup> 0.3                   |
| Degradation rate             | $k_{soil}$    | s <sup>-1</sup>                | <sup>b</sup> 1.00×10 <sup>-8</sup> |

2 (a) Jury et al. (1983); (b) Finlayson-Pitts and Pitts (2000) and Klöpffer et al. (2007).

3

4

5 **Table S2. The parameters used in the ILCR modle for different age groups <sup>a</sup>.**

| Parameter                                                      | Units                           | Children         | Women            | Men              |
|----------------------------------------------------------------|---------------------------------|------------------|------------------|------------------|
| <i>IR</i> (Inhalation rate)                                    | $m^3 \cdot d^{-1}$              | 10.8             | 14.5             | 17.7             |
| <i>EF</i> (Exposure duration)                                  | $d \cdot year^{-1}$             | 350              | 350              | 350              |
| <i>ED</i> (Exposure period)                                    | <i>year</i>                     | 6                | 24               | 24               |
| <i>BW</i> (Body weight)                                        | <i>kg</i>                       | 21.8             | 56.8             | 65.0             |
| <i>SA</i> (Skin exposed surface area)                          | $cm^2$                          | 1600             | 4350             | 4350             |
| <i>ABS</i> (Skin absorption factor)                            | dimensionless                   | 0.13             | 0.13             | 0.13             |
| <i>AT</i> (average exposure time)                              | <i>d</i>                        | 25550            | 25550            | 25550            |
| <i>AF</i> (Dermal adherence rate)                              | $mg \cdot cm^{-2} \cdot d^{-1}$ | 0.04             | 0.02             | 0.02             |
| <i>CF</i> (Conversion factor)                                  | dimensionless                   | 10 <sup>-6</sup> | 10 <sup>-6</sup> | 10 <sup>-6</sup> |
| $SFO_{inh}^b$<br>(carcinogenic slope factor of inhalation)     | $kg \cdot day \cdot mg^{-1}$    | 3.14             | 3.14             | 3.14             |
| $SFO_{der}^b$<br>(carcinogenic slope factor of dermal contact) | $kg \cdot day \cdot mg^{-1}$    | 37.47            | 37.47            | 37.47            |

6 (a) ChinaMEP, 2013. (b) Hussain et al., 1998.

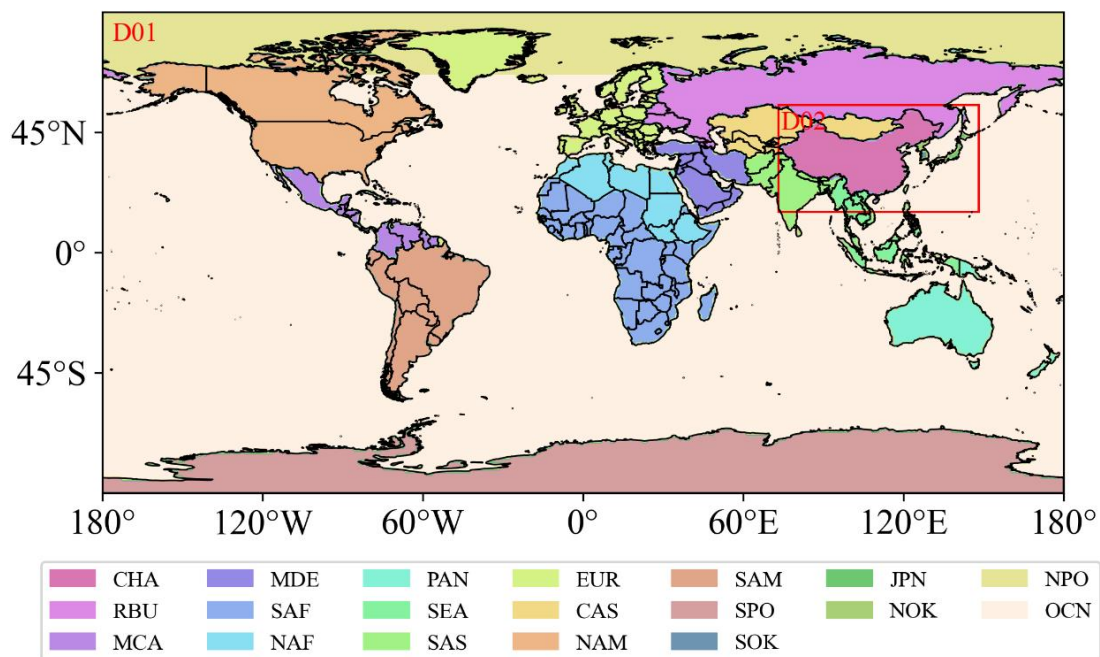

7  
8  
9  
10  
11 **Figure S1. The nested domains (red box) and the division of Global.**

**Table S3. The definition of regions in the world.**

| Region | Definition                                                       |
|--------|------------------------------------------------------------------|
| CHA    | China                                                            |
| RBU    | Russia, Belarussia, Ukraine                                      |
| MCA    | Mexico, Central America, Caribbean, Guyanas, Venezuela, Colombia |
| MDE    | Middle East                                                      |
| SAF    | Southern Africa                                                  |
| NAF    | Northern Africa, Sahara, Sahel                                   |
| PAN    | Pacific, Australia, New Zealand                                  |
| SEA    | South East Asia                                                  |
| SAS    | South Asia                                                       |
| EUR    | Europe                                                           |
| CAS    | Central Asia, Mongolia                                           |
| NAM    | United States + Canada                                           |
| SAM    | South America                                                    |
| SPO    | Antarctic                                                        |

|     |                            |
|-----|----------------------------|
| SOK | South Korea                |
| JPN | Japan                      |
| NOK | North Korea                |
| NPO | the ocean north of 66.5° N |
| OCN | Non-arctic Ocean           |

12

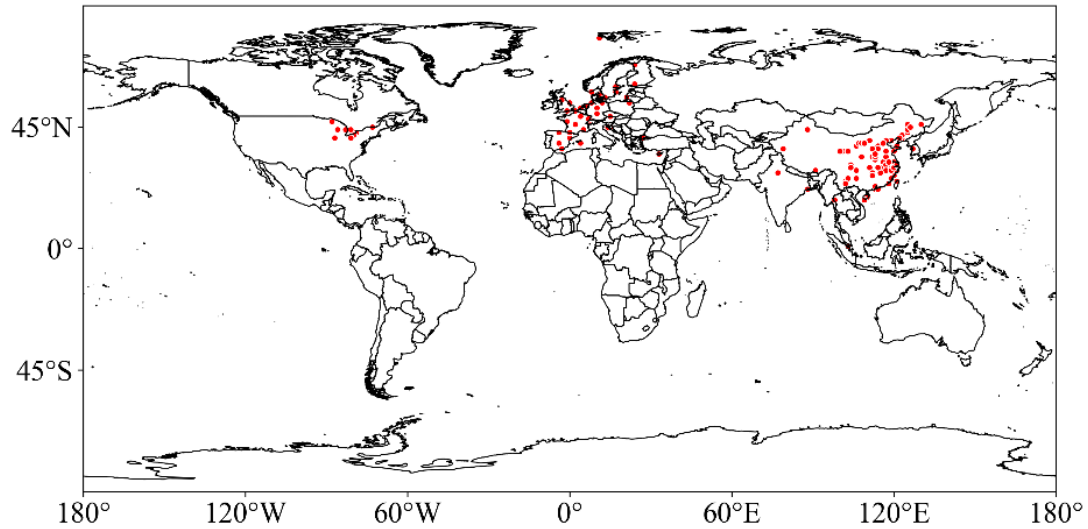

13

14

Figure S2. The spatial distribution of the BaP observations

15

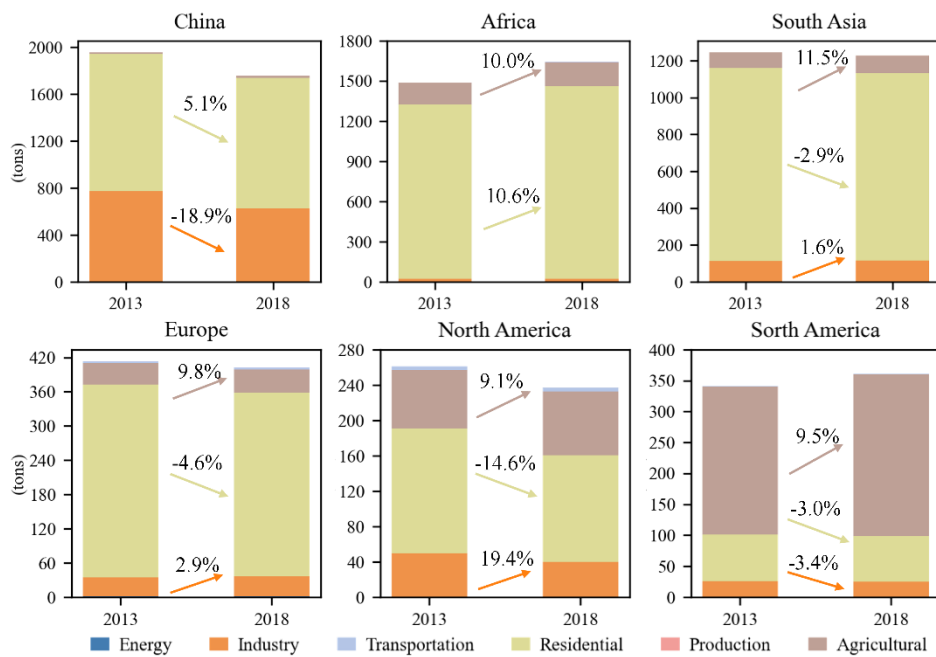

16

17

Figure S3. Emissions and changes for different sectors in China, Africa, South Asia, Europe, North America, and South America in 2013 and 2018

18

19

**Table S4. Details of monitoring sites in Europe <sup>c</sup>.**

| Country        | Code | Latitude    | Longitude   |
|----------------|------|-------------|-------------|
| Belgium        | B13  | 51°0'58" N  | 2°34'56" E  |
| Croatia        | H02  | 45°54'0" N  | 15°58'0" E  |
| Cyprus         | C02  | 35°2'20" N  | 33°3'29" E  |
| Czech Republic | C03  | 49°35'0" N  | 15°5'0" E   |
|                | D01  | 54°55'32" N | 8°18'35" E  |
|                | D02  | 52°48'8" N  | 10°45'34" E |
| Germany        | D03  | 47°54'53" N | 7°54'31" E  |
|                | D08  | 50°39'0" N  | 10°46'0" E  |
|                | D09  | 54°26'0" N  | 12°44'0" E  |
|                | E01  | 39°32'49" N | 4°21'2" W   |
|                | E06  | 39°52'3" N  | 4°19'19" E  |
| Spain          | E07  | 37°14'14" N | 3°32'3" W   |
|                | E08  | 43°26'32" N | 4°51'1" W   |
|                | E14  | 41°23'33" N | 0°44'3" E   |
|                | F18  | 60°31'48" N | 27°40'3" E  |
| Finland        | F36  | 68°0'0" N   | 24°14'23" E |
|                | F50  | 61°51'0" N  | 24°17'0" E  |
|                | R08  | 48°30'0" N  | 7°8'0" E    |
|                | R09  | 49°54'0" N  | 4°38'0" E   |
|                | R13  | 43°37'0" N  | 0°11'0" E   |
| France         | R23  | 44°34'10" N | 5°16'44" E  |
|                | R24  | 47°49'55" N | 1°50'11" W  |
|                | R25  | 46°48'53" N | 2°36'36" E  |
|                | G14  | 54°20'4" N  | 0°48'27" W  |
|                | G55  | 51°8'59" N  | 1°26'18" W  |
| Great Britain  | G36  | 51°34'23" N | 1°19'0" W   |
|                | G48  | 55°47'31" N | 3°14'34" W  |

|             |     |             |             |
|-------------|-----|-------------|-------------|
| Latvia      | L10 | 56°9'44" N  | 21°10'23" E |
| Netherlands | N09 | 53°33'4" N  | 6°27'68" E  |
|             | N91 | 52°29'66" N | 4°51'9" E   |
| Norway      | N02 | 58°23'0" N  | 8°15'0" E   |
|             | N42 | 78°54'0" N  | 11°53'0" E  |
| Poland      | P05 | 54°7'3" N   | 22°2'17" E  |
|             | P09 | 53°39'44" N | 17°56'2" E  |
| Slovenia    | S08 | 45°33'45" N | 14°51'45" E |
|             | S11 | 56°1'0" N   | 13°9'0" E   |
|             | S12 | 58°48'0" N  | 17°23'0" E  |
| Sweden      | S14 | 57°23'38" N | 11°55'50" E |
|             | S20 | 56°2'44" N  | 13°8'80" E  |
|             | S22 | 60°5'9" N   | 17°30'19" E |

21  
22  
23  
24

**Table S5. Details of monitoring sites in Asia, the United States, and Canada.**

| Location  | Latitude | Longitude | Sampling time | Area type | Reference         |
|-----------|----------|-----------|---------------|-----------|-------------------|
| Beijing   | 39.93°N  | 116.34°E  | 2013          | Urban     | Liu et al., 2017  |
| Chengdu   | 30.64°N  | 104.08°E  | 2013          | Urban     | Liu et al., 2017  |
| Lanzhou   | 36.05°N  | 103.86°E  | 2013          | Urban     | Liu et al., 2017  |
| Wuhan     | 30.53°N  | 114.37°E  | 2013          | Urban     | Liu et al., 2017  |
| Taiyuan   | 37.54°N  | 112.33°E  | 2013          | Urban     | Liu et al., 2017  |
| Xinxiang  | 35.33°N  | 113.91°E  | 2013          | Urban     | Liu et al., 2017  |
| Guangzhou | 23.15°N  | 113.36°E  | 2013          | Urban     | Liu et al., 2017  |
| Nanjing   | 32.06°N  | 118.8°E   | 2013          | Urban     | Liu et al., 2017  |
| Shanghai  | 31.29°N  | 121.5°E   | 2013          | Urban     | Liu et al., 2017  |
| Jinan     | 36.60°N  | 117.01°E  | 2014          | Urban     | Jiao et al., 2016 |
| Huangshi  | 30.17°N  | 115.0°E   | 2013          | Urban     | Hu et al., 2018   |
| Fushun    | 41.86°N  | 123.79°E  | 2013          | Urban     | Zhao et al., 2014 |
| Huainan   | 32.6°N   | 116.9°E   | 2013          | Urban     | Hu et al., 2016   |

|              |         |          |           |          |                    |
|--------------|---------|----------|-----------|----------|--------------------|
| Hohhot       | 40.8°N  | 111.6°E  | 2015      | Urban    | Wei et al., 2017   |
| Jiaozuo      | 35.2°N  | 113.27°E | 2013      | Urban    | Ji et al., 2017    |
| Hefei        | 31.82°N | 117.22°E | 2013      | Urban    | Zheng et al., 2014 |
| Haikou       | 19.98°N | 110.33°E | 2014      | Urban    | Liu et al., 2016   |
| Guiyang      | 26.58°N | 106.73°E | 2014      | Urban    | Zhou, 2016         |
| Changzhou    | 31.78°N | 119.92°E | 2016      | Suburban | Wang, 2017         |
| Zhenjiang    | 32.53°N | 119.6°E  | 2016      | Urban    | Wang et al., 2018  |
| Jiangning    | 32.6°N  | 119.42°E | 2016      | Urban    | Wang et al., 2018  |
| Wuxi         | 31.93°N | 120.4°E  | 2016      | Urban    | Wang et al., 2018  |
| Xuzhou       | 34.46°N | 117.25°E | 2016      | Urban    | Wang et al., 2018  |
| Hong Kong    | 22.21°N | 114.25°E | 2013      | Urban    | Leung et al., 2014 |
| Urumqi       | 44.28°N | 88.02°E  | 2010      | Urban    | Limu et al., 2013  |
| Chongqing    | 29.49°N | 106.48°E | 2012      | Urban    | Chen, 2013         |
| Chongqing    | 29.83°N | 106.38°E | 2012      | Suburban | Chen, 2013         |
| Yuxi         | 24.85°N | 102.85°E | 2014      | Urban    | Huang, 2016        |
| Yichang      | 30.85°N | 112.29°E | 2015      | Urban    | Yang et al., 2017  |
| Xuzhou       | 34.2°N  | 117.17°E | 2012      | Urban    | Chen et al., 2013  |
| Xiangtan     | 27.74°N | 112.54°E | 2015-2016 | Urban    | Wang et al., 2016  |
| Wenzhou      | 27.98°N | 120.76°E | 2015      | Urban    | Zheng et al., 2017 |
| Taizhou      | 28.5°N  | 121.5°E  | 2015-2016 | Urban    | Tao et al., 2017   |
| Shijiazhuang | 38.02°N | 114.5°E  | 2015      | Urban    | Zhang, 2016        |
| Shijiazhuang | 37.8°N  | 114.53°E | 2015      | Suburban | Zhang, 2016        |
| Qingdao      | 36.06°N | 120.34°E | 2013      | Urban    | Wang, 2015         |
| Pingdingshan | 33.71°N | 113.31°E | 2015      | Urban    | Wang, 2017         |
| Luoyang      | 34.67°N | 112.43°E | 2015      | Urban    | Wang, 2017         |
| Zhengzhou    | 34.8°N  | 113.53°E | 2015      | Urban    | Wang, 2017         |
| Nanjing      | 32.05°N | 118.74°E | 2013      | Urban    | Wang, 2015         |
| Nanchang     | 28.65°N | 115.83°E | 2013      | Urban    | Wang, 2015         |
| Mianyang     | 31.54°N | 104.69°E | 2013      | Urban    | Wang, 2015         |
| Kunshan      | 31.11°N | 120.81°E | 2013      | Urban    | Yu et al., 2015    |
| Lanxi        | 29.15°N | 119.47°E | 2014,2016 | Urban    | Zhou et al., 2018  |

|                        |         |          |            |                    |                               |
|------------------------|---------|----------|------------|--------------------|-------------------------------|
| Lhasa                  | 29.64°N | 91.18°E  | 2008, 2009 | Urban              | Ma et al., 2013b              |
| Yinchuan               | 38.41°N | 106.28°E | 2015       | Urban              | Tian et al., 2017             |
| Xi'an                  | 34.23°N | 108.82°E | 2013       | Urban              | Wang et al., 2017             |
| Panjin                 | 41.17°N | 122.07°E | 2013       | Urban              | Tao, 2015                     |
| Ningbo                 | 29.4°N  | 121.37°E | 2009, 2010 | Rural              | Liu et al., 2014              |
| Nantong                | 32.52°N | 120.55°E | 2016       | Urban              | Cui and Wu, 2018              |
| Jinhua                 | 29.12°N | 119.71°E | 2016       | Urban              | He et al., 2017               |
| Hotan                  | 37.1°N  | 79.5°E   | 2014       | Urban              | Suwubinuer et al.,<br>2018    |
| Hainan                 | 18.84°N | 109.5°E  | 2011       | Suburban           | Ma et al., 2013a              |
| Harbin                 | 45.72°N | 126.73°E | 2013       | Urban              | Li, 2015                      |
| Fuzhou                 | 26.1°N  | 119.29°E | 2010       | Urban,<br>Suburban | Yi et al., 2013               |
| Ordos                  | 36.3°N  | 107.18°E | 2005       | Urban              | Wu et al., 2014               |
| Shenzhen               | 22.59°N | 113.97°E | 2012, 2013 | Urban              | Sun et al., 2015              |
| Jinan                  | 36.66°N | 117.05°E | 2011       | Urban              | Yang, 2014                    |
| Mianyang               | 31.54°N | 104.71°E | 2014, 2015 | Urban              | Zhuo et al., 2017             |
| Kunming                | 24.83°N | 102.87°E | 2014, 2015 | Urban              | Zhuo et al., 2017             |
| Kunming                | 25.4°N  | 102.7°E  | 2013       | Urban              | Bi et al., 2015               |
| Jiamusi                | 46.79°N | 130.37°E | 2012       | Suburban           | Li et al., 2013               |
| Jilin                  | 44.0°N  | 125.67°E | 2008       | Urban              | Li et al., 2011               |
| Huludao                | 40.0°N  | 119.3°E  | 2008       | Urban              | Li et al., 2011               |
| Changchun              | 43.84°N | 125.31°E | 2008       | Urban              | Li et al., 2011               |
| Qingyuan               | 23.68°N | 113.17°E | 2010       | Urban              | Wei et al., 2012              |
| Xining                 | 36.56°N | 101.75°E | 2007       | Urban              | Tang et al., 2010             |
| Waliguan               | 36.3°N  | 100.9°E  | 2007       | Urban              | Tang et al., 2010             |
| India                  | 28°N    | 77°E     | 2007,2008  | Urban              | Singh et al., 2011            |
| India                  | 22°N    | 88°E     | 1992-1994  | Urban              | Chattopadhyay et<br>al., 1998 |
| Sturgeon<br>Point      | 44.65°N | 83.3°W   | 2013       | Urban              | IADN <sup>a</sup>             |
| Sleeping Bear<br>Dunes | 44.98°N | 86.18°W  | 2013       | Urban              | IADN <sup>a</sup>             |
| Point Petre            | 44.28°N | 81.65°W  | 2013       | Urban              | IADN <sup>a</sup>             |



|                                      |         |         |      |       |                   |
|--------------------------------------|---------|---------|------|-------|-------------------|
| Eagle Harbor                         | 47.5°N  | 88.05°W | 2013 | Urban | IADN <sup>a</sup> |
| Cleveland                            | 41.48°N | 81.68°W | 2013 | Urban | IADN <sup>a</sup> |
| Chicago                              | 41.86°N | 87.62°W | 2013 | Urban | IADN <sup>a</sup> |
| Montreal-<br>Riviere des<br>Prairies | 45.65°N | 73.57°W | 2013 | Urban | NAPS <sup>b</sup> |
| Toronto -<br>Gage Institute          | 43.65°N | 79.39°W | 2013 | Urban | NAPS <sup>b</sup> |
| Simcoe                               | 42.85°N | 80.26°W | 2013 | Rural | NAPS <sup>b</sup> |

25 (a) IADN: the Integrated Atmospheric Deposition Network.

26 (b) NAPS: the National Air Pollution Surveillance network

27

28

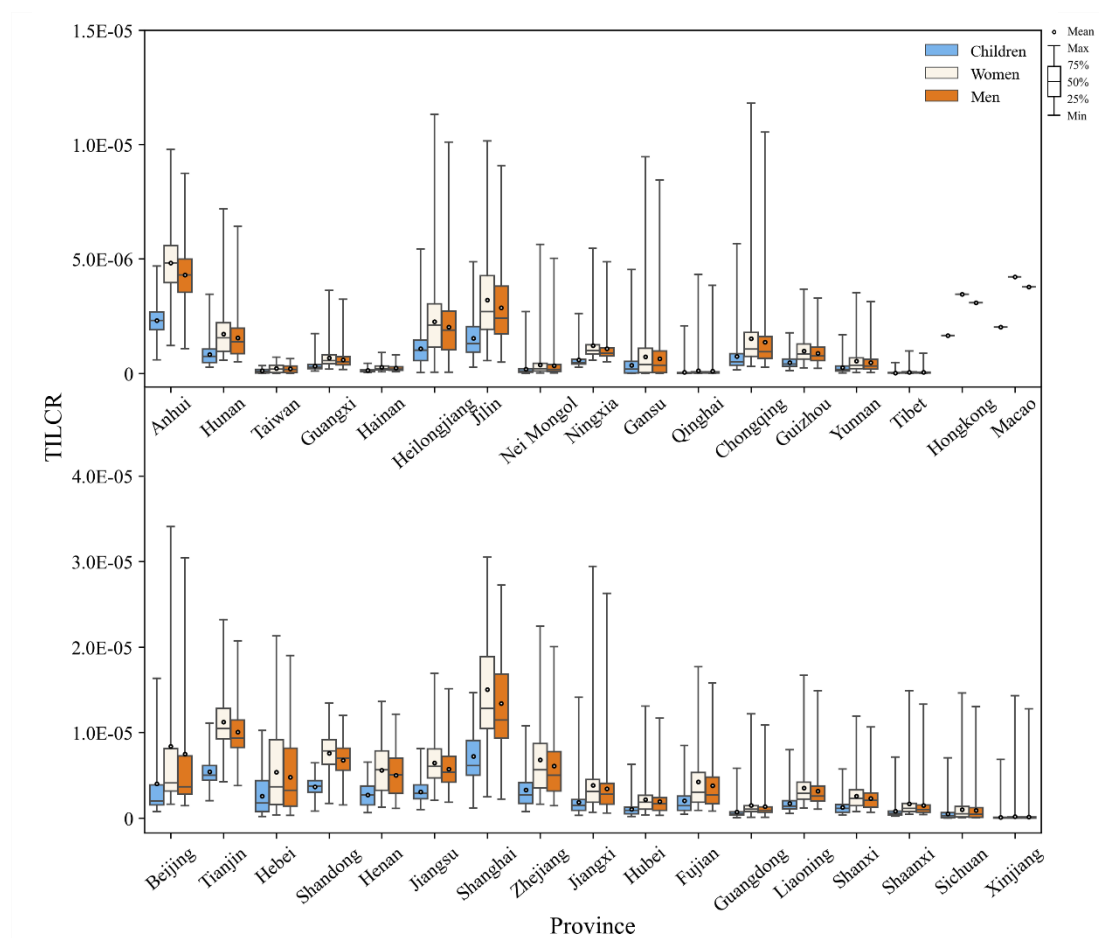

29

30 **Figure S4. The TILCR values for the three age groups (Children, Women, and Men) in different provinces**  
 31 **of China in 2018.**

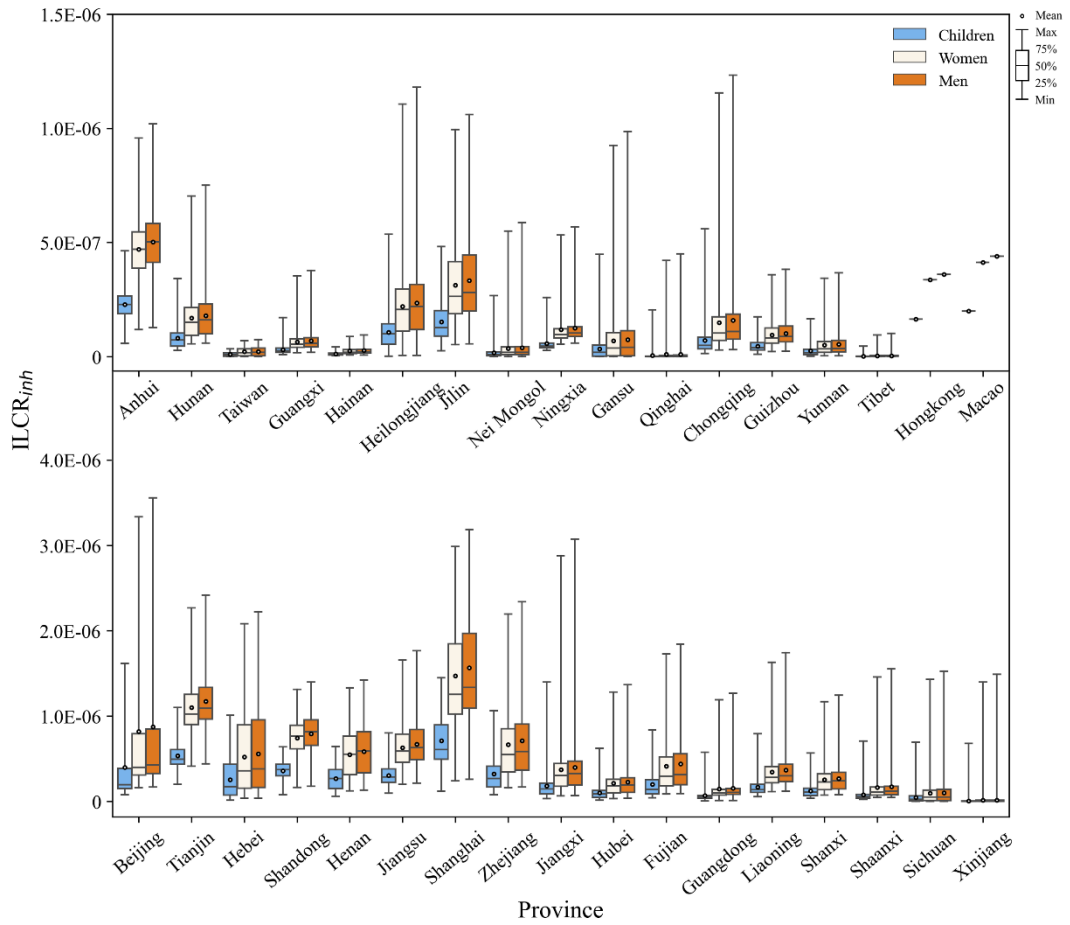

32  
 33  
 34  
 35  
 36

**Figure S5. The ILCR<sub>inh</sub> values for the three groups (Children, Women, and Men) in different provinces of China in 2018.**

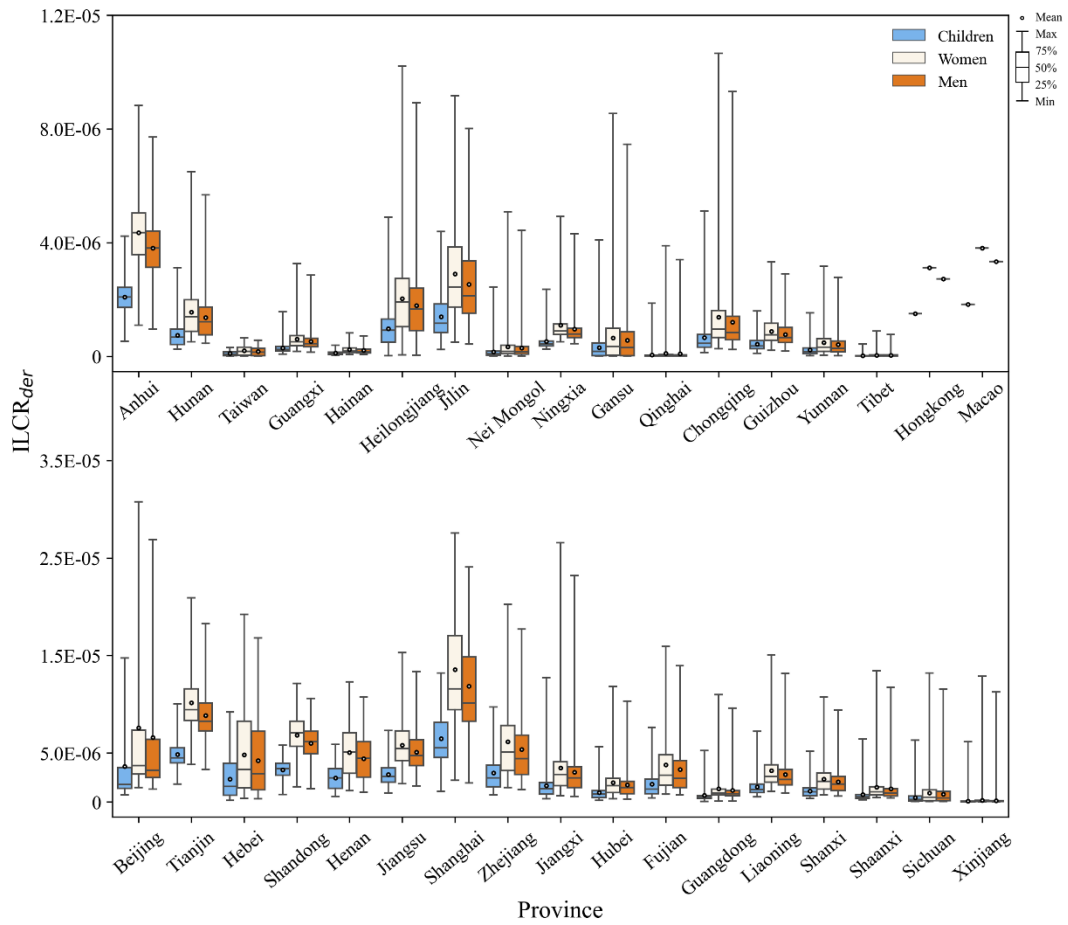

37

38

**Figure S6. The ILCR<sub>der</sub> values for the three groups (Children, Women, and Men) in different provinces of China in 2018.**

39

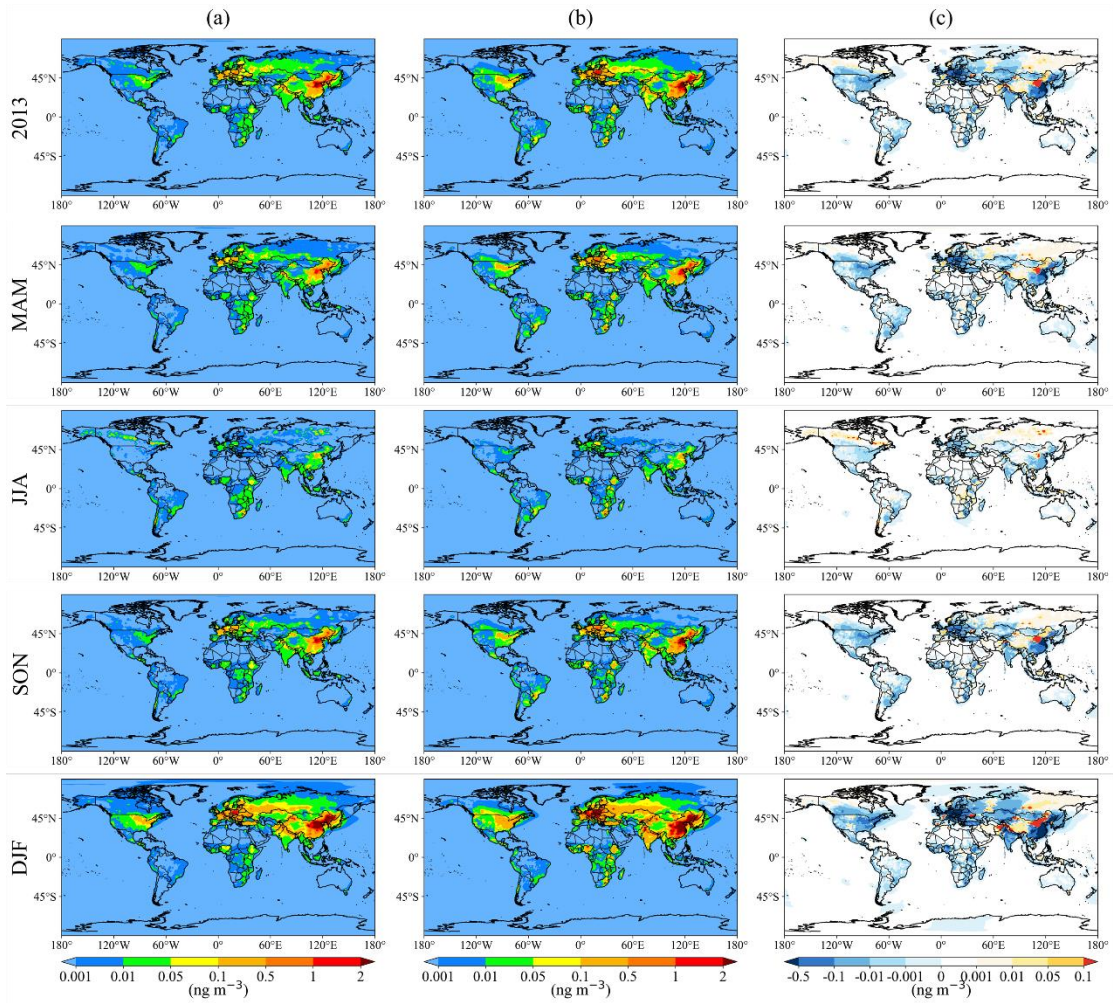

40

41

42

43

**Figure S7. Spatial distributions of annual and seasonal mean BaP concentrations based on the (a) PKU and (b) EDGAR inventories in 2013. The concentration (c) difference between PKU and EDGAR, positive values indicate that the result of PKU is greater than that of EDGAR, negative values are the opposite.**

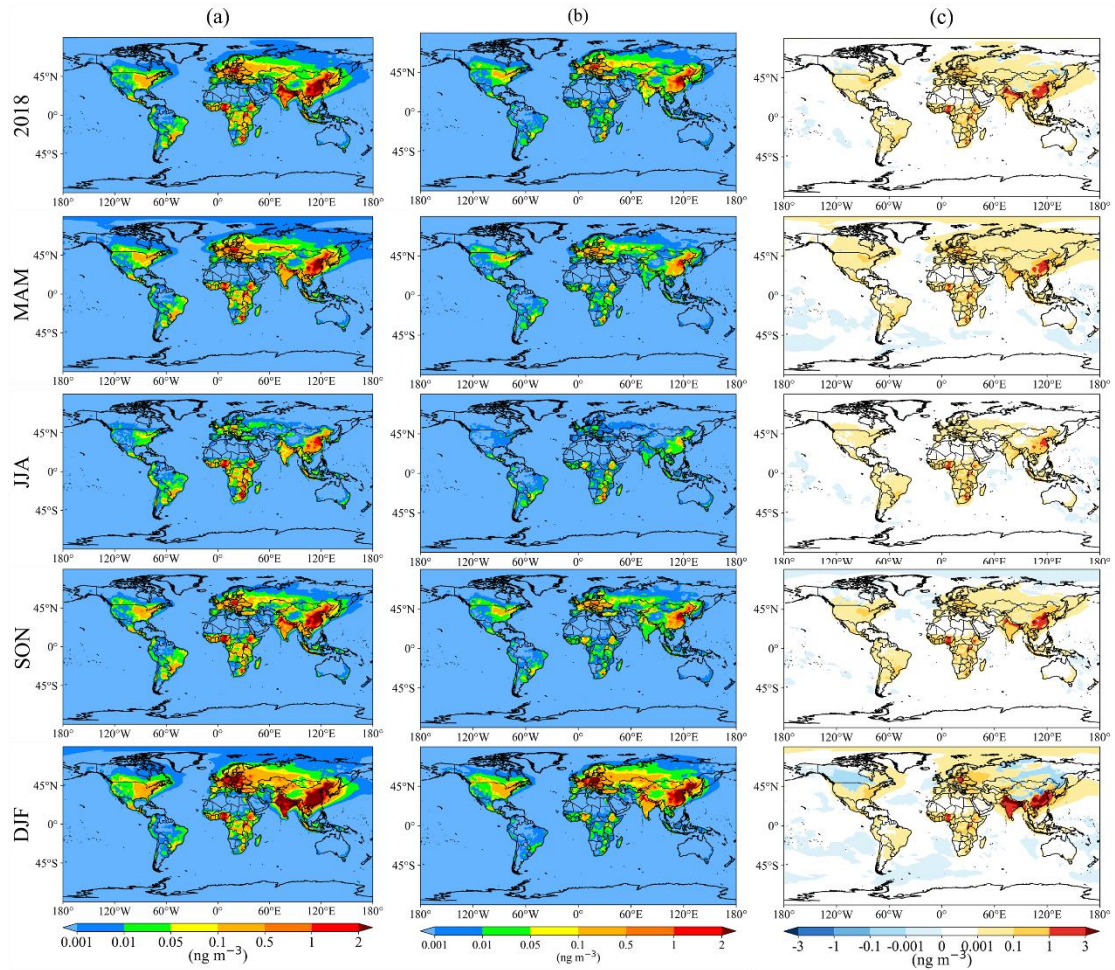

44

45

46

47

48

49

**Figure S8. Spatial distributions of annual and seasonal mean BaP concentrations based on the (a) no-heterogeneous reactions and (b) ROI-T mechanisms in 2018. The concentration (c) difference between no-heterogeneous reactions and ROI-T, positive values indicate that the result of no-heterogeneous reactions is greater than that of ROI-T, negative values are the opposite.**



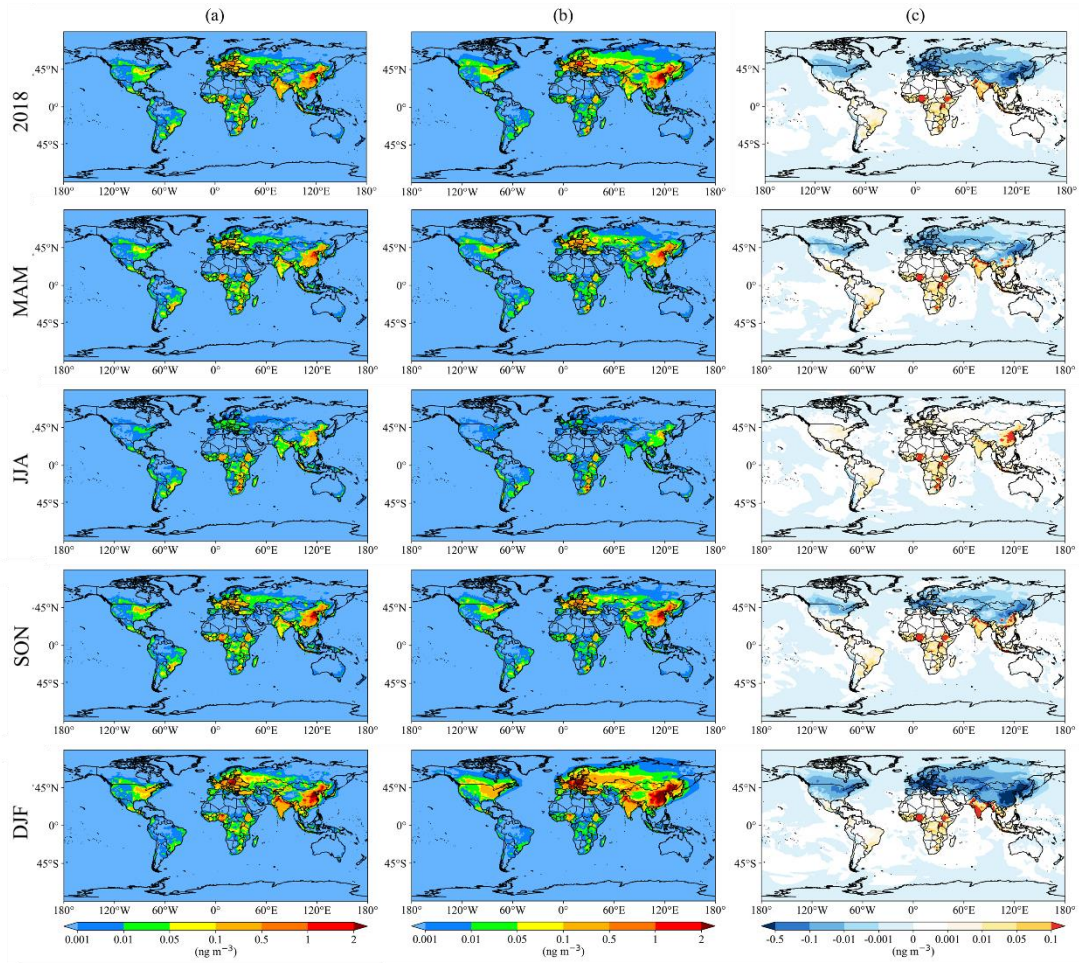

50

51

52

53

54

**Figure S9. Spatial distributions of annual and seasonal mean BaP concentrations based on the (a) Langmuir-Hinshelwood and (b) ROI-T mechanisms in 2018. The concentration (c) difference between Langmuir-Hinshelwood and ROI-T, positive values indicate that the result of Langmuir-Hinshelwood is greater than that of ROI-T, negative values are the opposite.**

55 **References**

- 56 Bi, L. M., Hao, J. M., Ning, P., Shi, J. W., Shi, Z., and Xu, X. F.: Characteristics and sources  
57 apportionment of PM<sub>2.5</sub>-bound PAHs in Kunming (in Chinese), 35, 659-667, 2015.
- 58 Chattopadhyay, G., Samanta, G., Chatterjee, S., and Chakraborti, D.: Determination of Particulate Phase  
59 Polycyclic Aromatic Hydrocarbons in Ambient Air of Calcutta for Three Years During Winter,  
60 Environmental Technology, 19, 873-882, <https://doi.org/10.1080/09593331908616745>, 1998.
- 61 Chen, F., Qin, C. G., and Zhong, Q.: Source apportionment of polycyclic aromatic hydrocarbon in  
62 Xuzhou (in Chinese), Ecology and Environmental Sciences, 22, 1916-1921,  
63 <https://doi.org/10.16258/j.cnki.1674-5906.2013.12.009>, 2013.
- 64 Chen, M.: Analysis on the distribution of PAHs in PM<sub>10</sub> and PM<sub>2.5</sub> in Chongqing (in Chinese), M.S.  
65 thesis, Southwest University, China, 81 pp., 2013.
- 66 ChinaMEP: Exposure Factors Handbook of Chinese Population, China Environment Press, China, 71  
67 pp., 2013.
- 68 Cui, J., and Wu, P.: Pollution Characteristics and Source of Polycyclic Aromatic in Fine air Particulates  
69 in Nantong City (in Chinese), Arid Environmental Monitoring, 32, 119-123, 2018.
- 70 Finlayson - Pitts, B. J., and Pitts, J. N. Chemistry of the Upper and Lower Atmosphere: Theory,  
71 Experiments, and Applications. 2000.
- 72 He, C. Q., Sheng, W., Wang, Z. Y., Chen, Q., Sheng, J. R., and Luo, J. B.: Analysis of the mass  
73 concentration and major contaminants characteristics of PM<sub>2.5</sub> in Jinhua city (in Chinese),  
74 Chinese Journal of Health Laboratory Technology, 27, 3304-3306+3309, 2017.
- 75 Hu, T., Zhang, J., Xing, X., Zhan, C., Zhang, L., Liu, H., Liu, T., Zheng, J., Yao, R., and Cao, J.: Seasonal  
76 variation and health risk assessment of atmospheric PM<sub>2.5</sub>-bound polycyclic aromatic  
77 hydrocarbons in a classic agglomeration industrial city, central China, Air Quality, Atmosphere  
78 & Health, 11, 683-694, <https://doi.org/10.1007/s11869-018-0575-3>, 2018.
- 79 Hu, Y., zheng, L. G., Cheng, H., Chen, Y. C., Yang, Y., J., G. Y., and Kong, L. J.: Characteristics and  
80 Source Identification of Polycyclic Aromatic Hydrocarbons ( PAHs) in PM<sub>2.5</sub> in Huainan City  
81 (in Chinese), The Administration and Technique of Environmental Monitoring, 28, 33-37,  
82 <https://doi.org/10.19501/j.cnki.1006-2009.20161107.005>, 2016.
- 83 Huang, L.: The Pollution Characteristics of Particle-associated Polycyclic Aromatic Hydrocarbons(PAHs)

84 and Source Apportionment in Yuxi (in Chinese), M.S. thesis, Kunming University of Science  
85 and Technology, China, 92 pp., 2016.

86 Hussain, M., Rae, J., Gilman, A., and Kauss, P.: Lifetime health risk assessment from exposure of  
87 recreational users to polycyclic aromatic hydrocarbons, *Archives of Environmental*  
88 *Contamination and Toxicology*, 35, 527-531, <https://doi.org/10.1007/s002449900412>, 1998.

89 Ji, W. W., Tai, C., Song, D. Y., and Tang, J. T.: Pollution Characteristics and Source Apportionment of  
90 Atmospheric PAHs in PM<sub>2.5</sub>: a Case Study in Jiaozuo City (in Chinese), *Environmental Science*  
91 *& Technology*, 40, 92-99, 2017.

92 Jiao, H. T., Yang, Y. L., YU, Z. G., LI, X. W., Sun, Z., and Liu, L. Z.: Pollution characterization and  
93 health risk assessment of PM<sub>2.5</sub> in Shiliulihe community in Jinan 2014 (in Chinese), *Modern*  
94 *Preventive Medicine*, 43, 3688-3691+3695, 2016.

95 Jury, W. A., Spencer, W. F., and Farmer, W. J.: Behavior Assessment Model for Trace Organics in Soil:  
96 I. Model Description, *Journal of Environmental Quality*, 12, 558-564,  
97 <https://doi.org/10.2134/jeq1983.00472425001200040025x>, 1983.

98 Klöpffer, W., Wagner, B., and Scheringer, M.: Atmospheric degradation of organic substances data for  
99 persistence and long-range transport potential, *Environmental Science and Pollution Research*  
100 *- International*, 14, 143-144, <https://doi.org/10.1065/espr2007.04.408>, 2007.

101 Leung, P. Y., Wan, H. T., Billah, M. B., Cao, J. J., Ho, K. F., and Wong, C. K. C.: Chemical and biological  
102 characterization of air particulate matter 2.5, collected from five cities in China, *Environmental*  
103 *Pollution*, 194, 188-195, <https://doi.org/10.1016/j.envpol.2014.07.032>, 2014.

104 Li, S. X., Lu, H. J., Hu, G. C., Qiu, H. B., Wang, J. Q., Sha, J. Q., Liu, F. H., and Sun, G. C.:  
105 Characteristics of polycyclic aromatic hydrocarbons in PM<sub>2.5</sub> and health risk assessment in  
106 winter in suburb of Jiamusi, Heilongjiang (in Chinese), *Journal of Environment and Health*, 30,  
107 794-796, <https://doi.org/10.16241/j.cnki.1001-5914.2013.09.018>, 2013.

108 Li, W. F., Peng, Y., Shi, J. W., Qiu, W. G., Wang, J., and Bai, Z. P.: Particulate polycyclic aromatic  
109 hydrocarbons in the urban Northeast Region of China: Profiles, distributions and sources,  
110 *Atmospheric Environment*, 45, 7664-7671, <https://doi.org/10.1016/j.atmosenv.2011.04.004>,  
111 2011.

112 Li, Y. J.: Pollution characteristics analysis of atmospheric particulate matter in Harbin (in Chinese), M.S.



113 thesis, Harbin Institute of Technology, China, 74 pp., 2015.

114 Limu, Y. L. M. A. B. D., LiFu, D. L. N. T., Miti, A. B. L. Y., Wang, X., and Ding, X.: Autumn and  
115 Wintertime Polycyclic Aromatic Hydrocarbons in PM<sub>2.5</sub> and PM<sub>2.5-10</sub> from Urumqi, China,  
116 Aerosol and Air Quality Research, 13, 407-414, <https://doi.org/10.4209/aaqr.2012.05.0130>,  
117 2013.

118 Liu, D., Lin, T., Syed, J. H., Cheng, Z. N., Xu, Y., Li, K. C., Zhang, G., and Li, J.: Concentration, source  
119 identification, and exposure risk assessment of PM<sub>2.5</sub>-bound parent PAHs and nitro-PAHs in  
120 atmosphere from typical Chinese cities, Scientific Reports, 7, 12,  
121 <https://doi.org/10.1038/s41598-017-10623-4>, 2017.

122 Liu, D., Xu, Y., Chaemfa, C., Tian, C. G., Li, J., Luo, C. L., and Zhang, G.: Concentrations, seasonal  
123 variations, and outflow of atmospheric polycyclic aromatic hydrocarbons (PAHs) at Ningbo site,  
124 Eastern China, Atmospheric Pollution Research, 5, 203-209,  
125 <https://doi.org/10.5094/apr.2014.025>, 2014.

126 Liu, J., Jian, L., Li, H. J., and Zhang, J.: Distribution Characteristics of PAHs in PM<sub>2.5</sub> during Autumn  
127 and Winter in Haikou (in Chinese), Environmental Science & Technology, 39, 86-90, 2016.

128 Ma, S. X., Zhang, X., Chen, L. G., Liu, M., Tang, C. M., and Su, Y. H.: Characteristics of PAHs  
129 concentration in the atmospheric PM<sub>2.5</sub> in Wuzhi Mountain background in Hainan, south China  
130 (in Chinese), China Environmental Science, 33, 103-107, 2013a.

131 Ma, W. L., Qi, H., Baidron, S., Liu, L. Y., Yang, M., and Li, Y. F.: Implications for long-range atmospheric  
132 transport of polycyclic aromatic hydrocarbons in Lhasa, China, Environmental Science and  
133 Pollution Research, 20, 5525-5533, <https://doi.org/10.1007/s11356-013-1577-1>, 2013b.

134 Singh, D. P., Gadi, R., and Mandal, T. K.: Characterization of particulate-bound polycyclic aromatic  
135 hydrocarbons and trace metals composition of urban air in Delhi, India, Atmospheric  
136 Environment, 45, 7653-7663, <https://doi.org/10.1016/j.atmosenv.2011.02.058>, 2011.

137 Sun, J. L., Jing, X., Chang, W. J., Chen, Z. X., and Zeng, H.: Cumulative health risk assessment of  
138 halogenated and parent polycyclic aromatic hydrocarbons associated with particulate matters in  
139 urban air, Ecotoxicology and Environmental Safety, 113, 31-37,  
140 <https://doi.org/10.1016/j.ecoenv.2014.11.024>, 2015.

141 Suwubinuier, R., Yusan, T., Dilnur, T., Wang, X. M., Abulikemu, A., Yalikunjiang, T., and Ding, X.:

142 Chemical characterization and Source Apportionment of PM<sub>2.5</sub> in Urban Area of Hotan, China  
143 (in Chinese), *Research of Environmental Sciences*, 31, 823-833,  
144 <https://doi.org/10.13198/j.issn.1001-6929.2017.04.23>, 2018.

145 Tang, L. L., Niu, S. J., Pan, S. X., Nie, H., Gao, R. X., Jin, S. H., and Yang, G. Y.: Observational Study  
146 of Spectral Distribution of Polycyclic Aromatic Hydrocarbons (PAHs) and PM<sub>10</sub> in Waliguan  
147 and Xining (in Chinese), *Plateau Meteorology*, 29, 236-243, 2010.

148 Tao, X. J.: Pollution and Health Risk Assessment of Airborne Particulate Matter in Panjin (in Chinese),  
149 M.S. thesis, Dalian University of Technology, China, 60 pp., 2015.

150 Tao, Z. H., Xie, S. Q., He, W. N., Ge, L. L., Li, W., Wang, Q. L., and Wang, X. Q.: Pollution  
151 Characteristics and Toxicity Assessment of PAHs in PM<sub>2.5</sub> in Taizhou (in Chinese),  
152 *Environmental Engineering*, 35, 152-156, <https://doi.org/10.13205/j.hjgc.201707030>, 2017.

153 Tian, D. N., Ding, R. M., Cai, Q., Zhang, P. J., and Wang, L.: Pollution characteristics of polycyclic  
154 aromatic hydrocarbons in PM<sub>2.5</sub> and PM<sub>10</sub> in Yinchuan (in Chinese), *Modern Preventive  
155 Medicine*, 44, 3672-3676, 2017.

156 Wang, J. Z., Cao, J. J., Dong, Z. B., Guinot, B., Gao, M. L., Huang, R. J., Han, Y. M., Huang, Y., Ho, S.  
157 S. H., and Shen, Z. X.: Seasonal variation, spatial distribution and source apportionment for  
158 polycyclic aromatic hydrocarbons (PAHs) at nineteen communities in Xi'an, China: The effects  
159 of suburban scattered emissions in winter, *Environmental Pollution*, 231, 1330-1343,  
160 <https://doi.org/10.1016/j.envpol.2017.08.106>, 2017.

161 Wang, Q.: Characteristics and source appointment of carbonaceous species in PM<sub>2.5</sub> in urban area of  
162 Zhengzhou, Luoyang and Pingdingshan (in Chinese), M.S. thesis, Zhengzhou University,  
163 China, 65 pp., 2017.

164 Wang, Q. Q., Ma, X. Y., Xu, B., Ding, Z., Chen, X. D., and Zhou, L.: Outdoor inhalation exposure risk  
165 assessment of polycyclic aromatic hydrocarbons among PM<sub>2.5</sub> in 4 Cities of Jiangsu province  
166 (in Chinese), *Jiangsu Journal of Preventive Medicine*, 29, 140-144+207,  
167 <https://doi.org/10.13668/j.issn.1006-9070.2018.02.007>, 2018.

168 Wang, R.: The preliminary study of PM<sub>10</sub>-bound Polycyclic Aromatic Hydrocarbons during winter and  
169 summer in some region, China (in Chinese), M.S. thesis, Xinjiang University, China, pp., 2015.

170 Wang, Z., Xu, X. Y., and Chen, R. X.: Regional distribution characteristics of polycyclic aromatic

171 hydrocarbons in PM<sub>2.5</sub> and health risk assessment in winter in Xiangtan, Hu'nan (in Chinese),  
172 Journal of Environment and Health, 33, 703-706, [https://doi.org/10.16241/j.cnki.1001-](https://doi.org/10.16241/j.cnki.1001-5914.2016.08.012)  
173 5914.2016.08.012, 2016.

174 Wei, N. N., Wang, W. R., Zhang, C. G., Yang, T., Li, J., Yu, D., Zhang, X. H., and Gao, S.: Distribution  
175 characteristics of atmospheric PM<sub>2.5</sub> and its polycyclic aromatic hydrocarbons in two districts  
176 of Hohhot (in Chinese), Journal of Environmental & Occupational Medicine, 34, 410-414,  
177 <https://doi.org/10.13213/j.cnki.jeom.2017.16608>, 2017.

178 Wei, S. L., Huang, B., Liu, M., Bi, X. H., Ren, Z. F., Sheng, G. Y., and Fu, J. M.: Characterization of  
179 PM<sub>2.5</sub>-bound nitrated and oxygenated PAHs in two industrial sites of South China,  
180 Atmospheric Research, 109, 76-83, <https://doi.org/10.1016/j.atmosres.2012.01.009>, 2012.

181 Wu, D., Wang, Z. S., Chen, J. H., Kong, S. F., Fu, X., Deng, H. B., Shao, G. F., and Wu, G.: Polycyclic  
182 aromatic hydrocarbons (PAHs) in atmospheric PM<sub>2.5</sub> and PM<sub>10</sub> at a coal-based industrial city:  
183 Implication for PAH control at industrial agglomeration regions, China, Atmospheric Research,  
184 149, 217-229, <https://doi.org/10.1016/j.atmosres.2014.06.012>, 2014.

185 Yang, C. P., Ma, B. B., Yu, Q., and Wan, Z. Y.: Characteristics of PM<sub>2.5</sub> pollution and its risk assessment  
186 in Yichang City (in Chinese), Practical Preventive Medicine, 24, 1209-1212, 2017.

187 Yang, F.: Analysis on characteristics and source apportionment of polycyclic aromatic  
188 hydrocarbons(PAHs) in atmospheric particles PM<sub>2.5</sub> in Jinan (in Chinese), M.S. thesis,  
189 Shandong University, China, 83 pp., 2014.

190 Yi, Z. G., Huang, X. R., Bi, J. Q., Guo, P. P., and Zheng, L. L.: Characteristics of PAHs in the atmosphere  
191 in winter and summer in the urban and suburban of Fuzhou (in Chinese), Environmental Science,  
192 34, 1252-1257, <https://doi.org/10.13227/j.hjkk.2013.04.019>, 2013.

193 Yu, L. M., Jiang, D. S., Chen, C., Sun, X. Y., and Gu, H. D.: Pollution Characteristics Study of  
194 Atmospheric Polycyclic Aromatic Hydrocarbons(PAHs) in PM<sub>2.5</sub> in Kunshan (in Chinese),  
195 Environmental Impact Assessment, 37, 78-81+85, <https://doi.org/10.14068/j.ceia.2015.01.020>,  
196 2015.

197 Zhang, W. W.: Pollution Characteristic and Sources of Organic Compounds in the Atmospheric  
198 Particles in Shijiazhuang (in Chinese), M.S. thesis, Hebei University of Science and Technology  
199 China, 61 pp., 2016.

200 Zhao, L. J., Zhang, J. S., Li, L. H., Zhao, M. M., and Wang, X.: Study of pollution characteristic of PAHs  
201 in PM<sub>2.5</sub> in Fushun Wanghua district (in Chinese), *Applied Chemical Industry* 43, 1336-1338,  
202 <https://doi.org/10.16581/j.cnki.issn1671-3206.2014.07.017>, 2014.

203 Zheng, Y. Z., Ge, L. L., Zheng, X. J., Zhu, C., Ruan, F. F., Tu, S. F., Li, S. J., Li, W., and Zhu, J. K.:  
204 Pollution characteristics and sources apportionment of PAHs bound to PM<sub>2.5</sub> in Wenzhou (In  
205 Chinese), *Environmental Pollution & Control*, 39, 534-539,  
206 <https://doi.org/10.15985/j.cnki.1001-3865.2017.05.015>, 2017.

207 Zheng, Z. X., Pan, C. R., Gao, K. L., and Wu, W.: Pollution characteristics and risk assessment of  
208 polycyclic aromatic hydrocarbons in PM<sub>10</sub> and PM<sub>2.5</sub> of Hefei City (in Chinese),  
209 *Environmental Science Survey*, 33, 55-59, <https://doi.org/10.13623/j.cnki.hkdk.2014.06.014>,  
210 2014.

211 Zhou, Y. D.: Pollution characteristics and health risk assessment on polycyclic aromatic hydrocarbons in  
212 PM<sub>2.5</sub> in Huaxi and Nanming district of Guiyang (in Chinese), M.S. thesis, Guizhou Normal  
213 University, China, 74 pp., 2016.

214 Zhou, Z. G., Hu, F. W., Bao, Z. W., Mao, W. W., and Feng, J. L.: Study on the composition characteristics,  
215 seasonal variation and sources of organic matter in PM<sub>2.5</sub> in Lanxi (in Chinese), *Acta Scientiae*  
216 *Circumstantiae*, 38, 2253-2261, <https://doi.org/10.13671/j.hjkxxb.2018.0063>, 2018.

217 Zhuo, S. J., Du, W., Shen, G. F., Wang, R., Pan, X. L., Li, T. C., Han, Y., Li, Y. G., Pan, B., Peng, X.,  
218 Cheng, H. F., Wang, X. L., Shi, G. L., Xing, B. S., and Tao, S.: Urban air pollution and health  
219 risks of parent and nitrated polycyclic aromatic hydrocarbons in two megacities, southwest  
220 China, *Atmospheric Environment*, 166, 441-453,  
221 <https://doi.org/10.1016/j.atmosenv.2017.07.051>, 2017.
